# Supplementary material for: The gut microbial metabolite formate exacerbates colorectal cancer progression
Source: PubMed Central journal article supplement (PMC9046088; doi:10.1038/s42255-022-00558-0), 2022-04-18

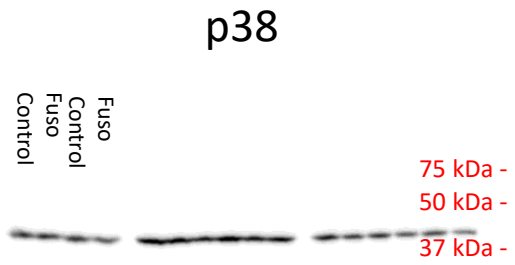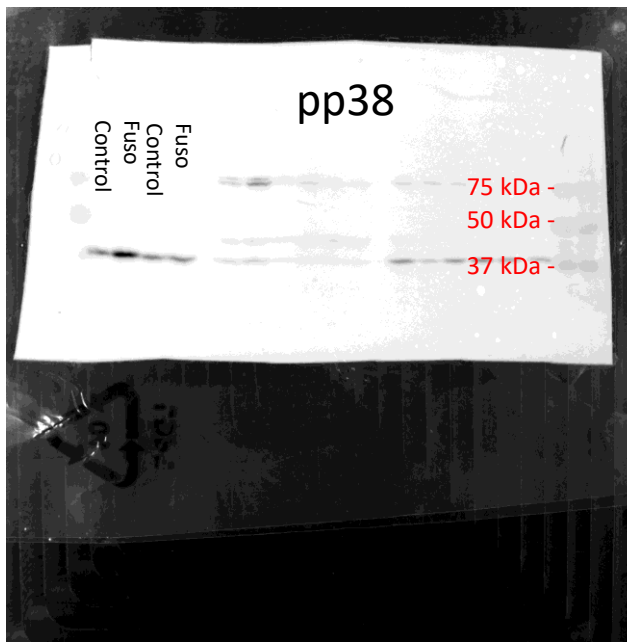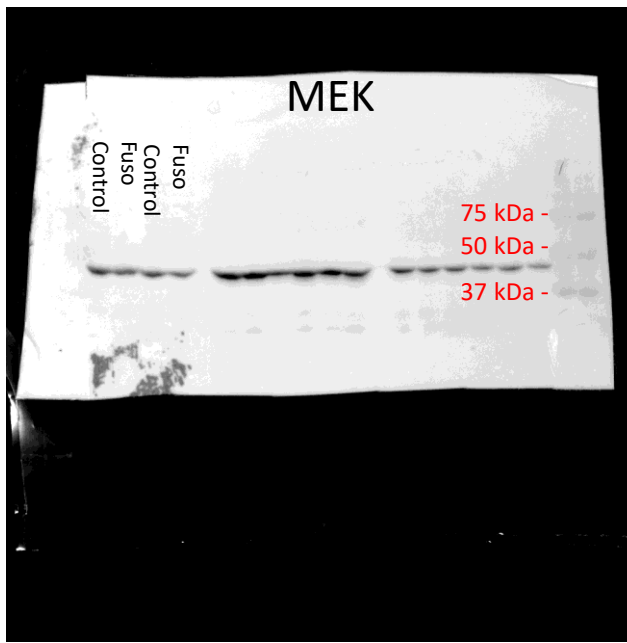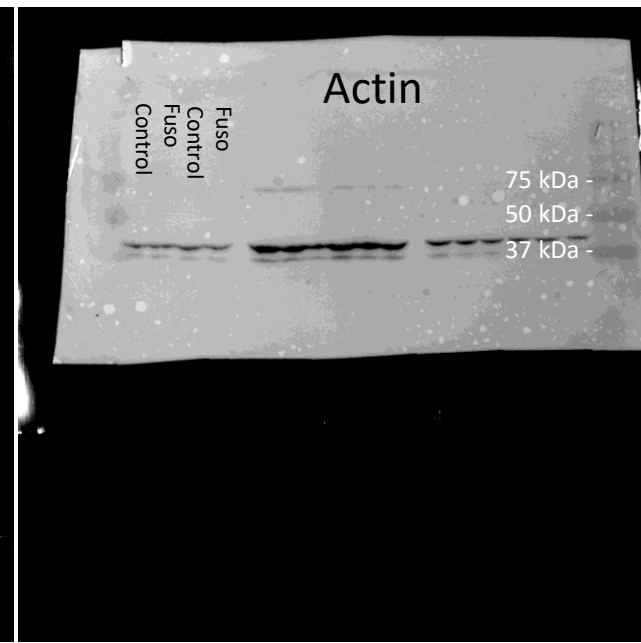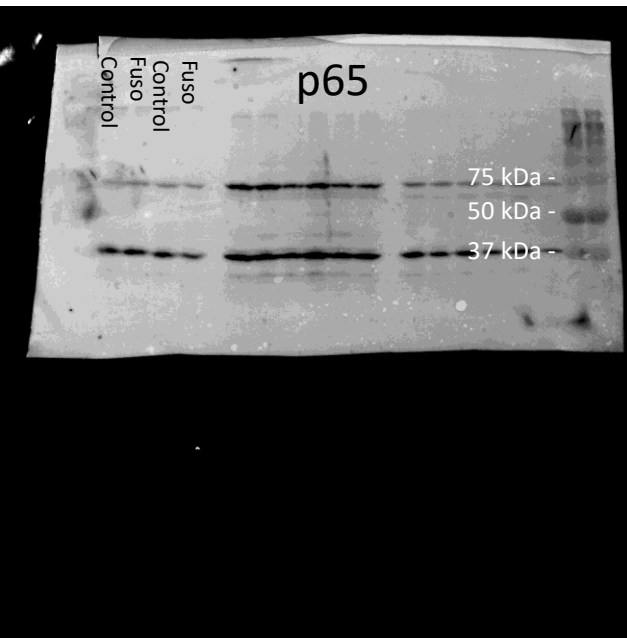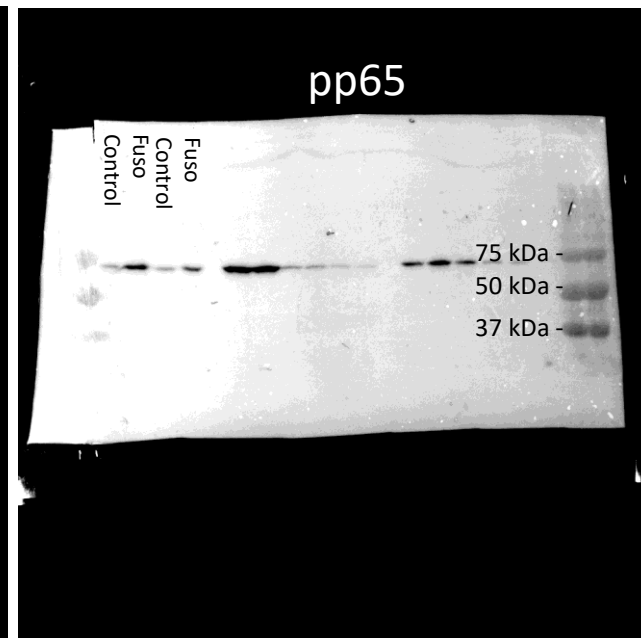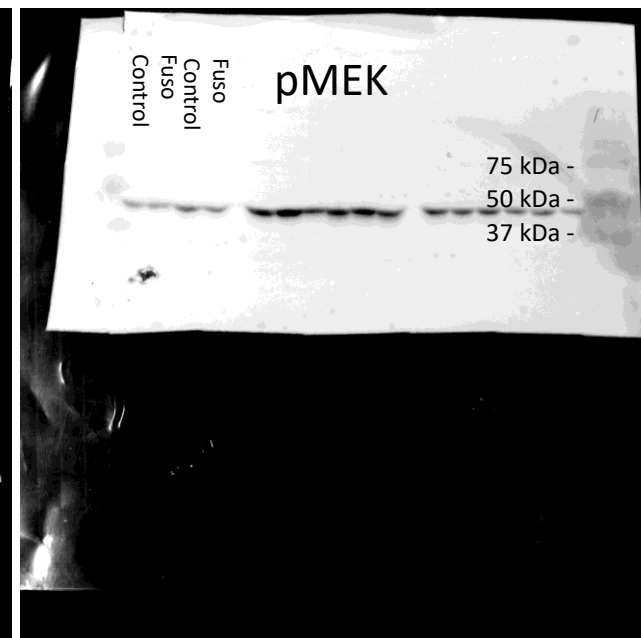

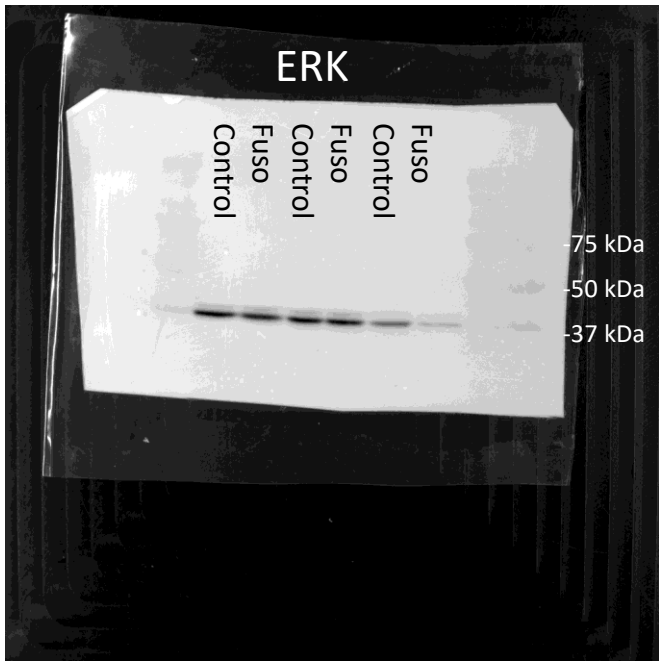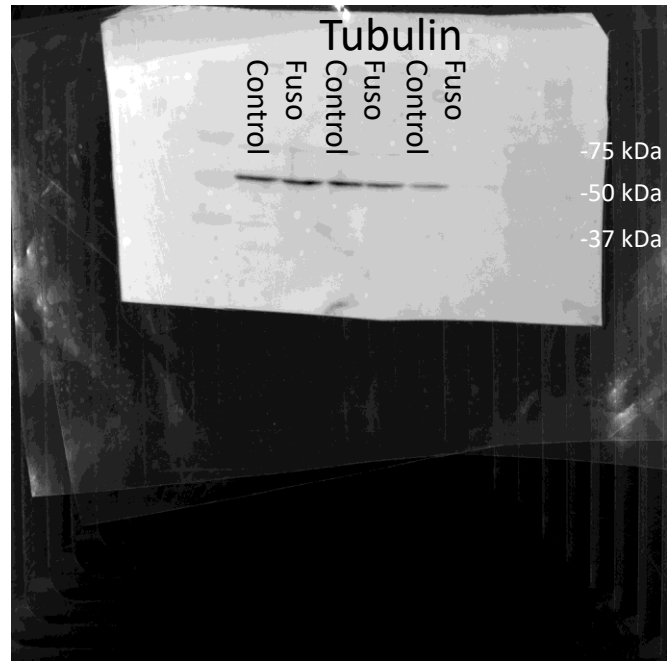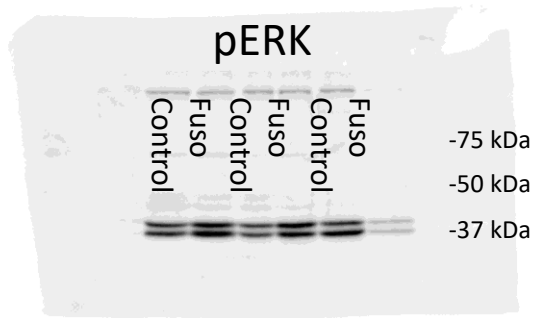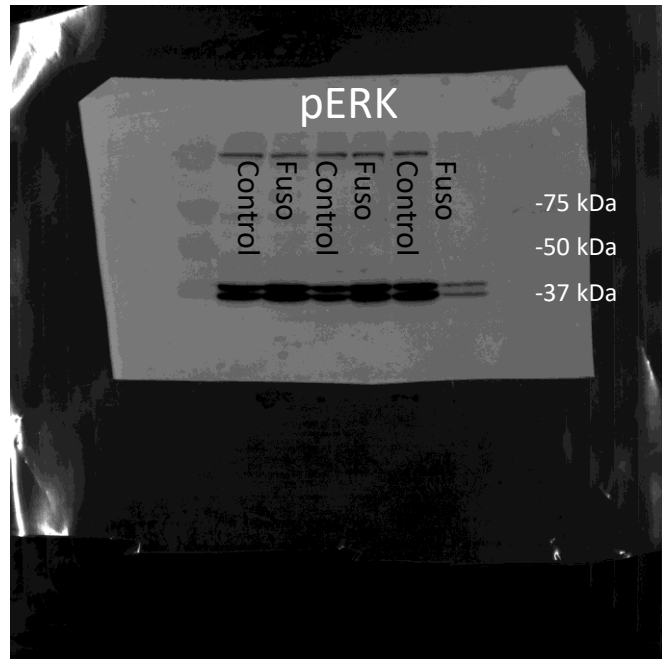

Supplement: 42255_2022_558_MOESM13_ESM.pdf [file 42255_2022_558_MOESM13_ESM.pdf]
